# Supplementary material for: 4D‐Var Inversion of European NH3 Emissions Using CrIS NH3 Measurements and GEOS‐Chem Adjoint With Bi‐Directional and Uni‐Directional Flux Schemes
Source: PubMed Central journal article supplement — J Geophys Res Atmos. 2022 May 6;127(9):e2021JD035687. doi: 10.1029/2021JD035687 (PMC9286853; doi:10.1029/2021jd035687), 2022-05-06
Supplement: JGRD-127-0-s001.pdf [file JGRD-127-0-s001.pdf]

**Supporting Information for  
“4D-Var inversion of European NH<sub>3</sub> emissions using CrIS NH<sub>3</sub> mea-  
surements and GEOS-Chem adjoint with bi-directional and uni-  
directional flux schemes”**

**Hansen Cao<sup>1</sup>, Daven K. Henze<sup>1</sup>, Liye Zhu<sup>2</sup>, Mark W. Shephard<sup>3</sup>, Karen  
Cady-Pereira<sup>4</sup>, Enrico Dammers<sup>5</sup>, Michael Sitwell<sup>3</sup>, Nicholas Heath<sup>4</sup>,  
Chantelle Lonsdale<sup>6</sup>, Jesse O. Bash<sup>7</sup>, Kazuyuki Miyazaki<sup>8</sup>, Christophe  
Flechard<sup>9</sup>, Yannick Fauvel<sup>9</sup>, Roy Wichink Kruit<sup>10</sup>, Stefan Feigenspan<sup>11</sup>,  
Christian Brümmer<sup>12</sup>, Frederik Schrader<sup>12</sup>, Marsailidh M. Twigg<sup>13</sup>, Sarah  
Leeson<sup>13</sup>, Yuk S. Tang<sup>13</sup>, Amy C.M. Stephens<sup>13</sup>, Christine Braban<sup>13</sup>, Keith  
Vincent<sup>14</sup>, Mario Meier<sup>15</sup>, Eva Seitler<sup>15</sup>, Camilla Geels<sup>16</sup>, Thomas Ellermann<sup>16</sup>,  
Agnieszka Sanocka<sup>14</sup>, Shannon L. Capps<sup>17</sup>**

<sup>1</sup>University of Colorado, Boulder, USA

<sup>2</sup>Sun Yat-sen University, China

<sup>3</sup>Environment and Climate Change Canada, Toronto, Ontario, Canada

<sup>4</sup>Atmospheric and Environmental Research Inc., USA

<sup>5</sup>Netherlands Organisation for Applied Scientific Research (TNO), Climate Air and Sustainability (CAS),  
Utrecht, The Netherlands

<sup>6</sup>Department of Civil, Structural and Environmental Engineering, University at Buffalo, Buffalo, NY USA

<sup>7</sup>U.S. Environmental Protection Agency, USA

<sup>8</sup>Jet Propulsion Laboratory, California Institute of Technology, USA

<sup>9</sup>INRAE (National Research Institute for Agriculture, Food and Environment), UMR SAS, Agrocampus  
Ouest, 65 rue de Saint-Brieuc, 35042 Rennes, France

<sup>10</sup>National Institute for Public Health and the Environment, The Netherlands

<sup>11</sup>German Environment Agency, Germany

<sup>12</sup>Thünen Institute of Climate-Smart Agriculture, Germany

<sup>13</sup>UK Centre for Ecology & Hydrology, UK

<sup>14</sup>Ricardo Energy & Environment, Wantage, England, UK

<sup>15</sup>Forschungsstelle für Umweltbeobachtung, Switzerland

<sup>16</sup>Department of Environmental Science, Aarhus University, Denmark

<sup>17</sup>Civil, Architectural, and Environmental Engineering Department, Drexel University, Philadelphia, PA,  
USA

## Contents

1. Figures S1 to S3

## Supporting figures and tables

---

Corresponding author: Hansen Cao, [hansen.cao@colorado.edu](mailto:hansen.cao@colorado.edu)

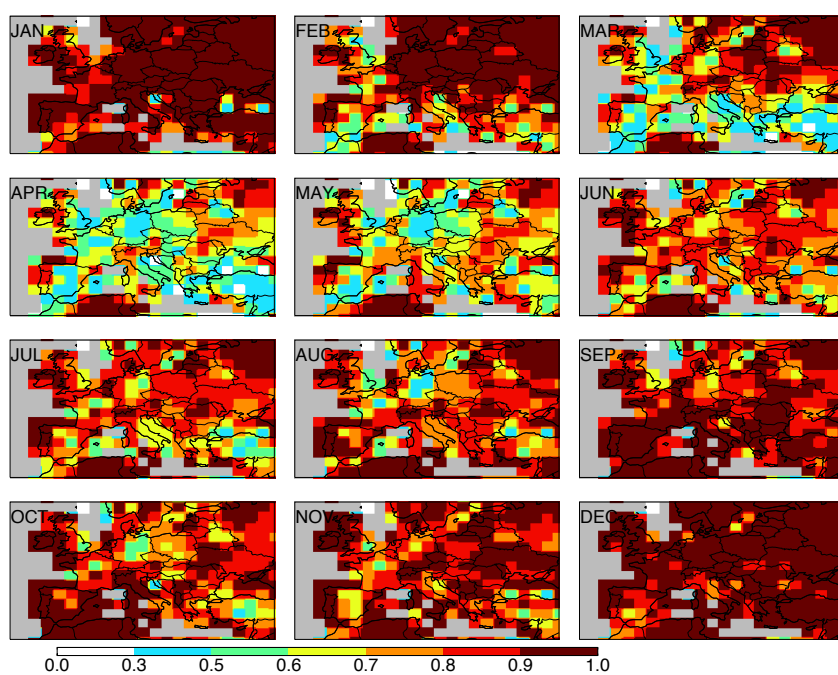

Figure S1: MASAGE-based ratio of monthly livestock NH<sub>3</sub> emissions to monthly total anthropogenic NH<sub>3</sub> emissions.

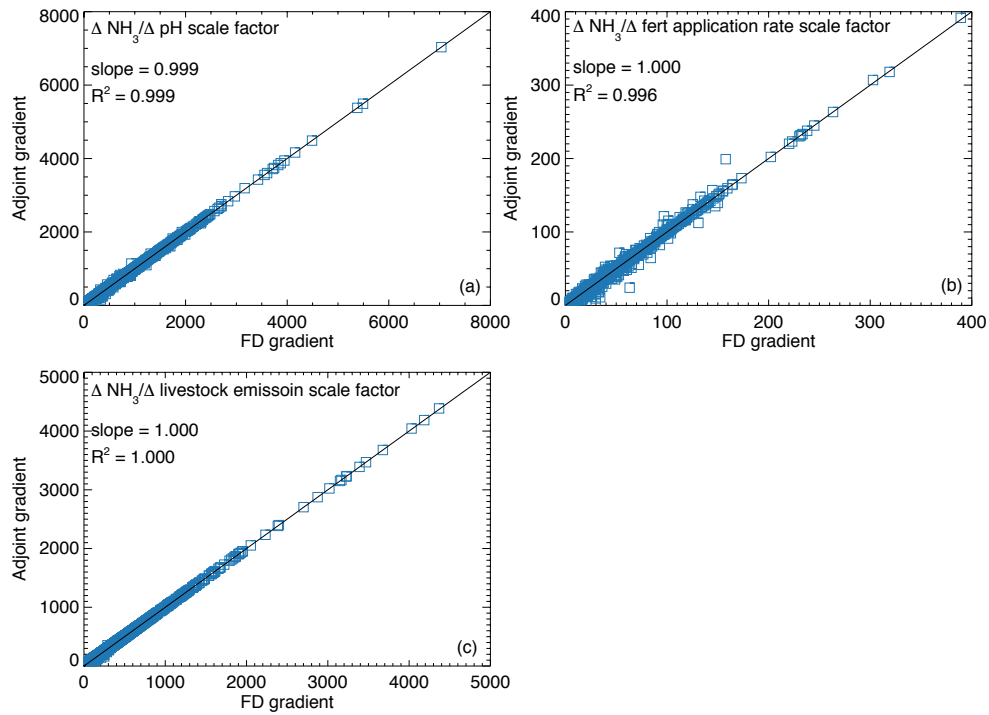

Figure S2: Scatter plot between adjoint gradient and finite difference (FD) gradient of simulated  $\text{NH}_3$  with respect to pH scale factor (a), fertilizer application rate scale factor (b) and livestock emission scale factor (c), respectively, from July 1<sup>st</sup> to 7<sup>th</sup> 2016 for the Europe domain at  $0.3125^\circ \times 0.25^\circ$ .

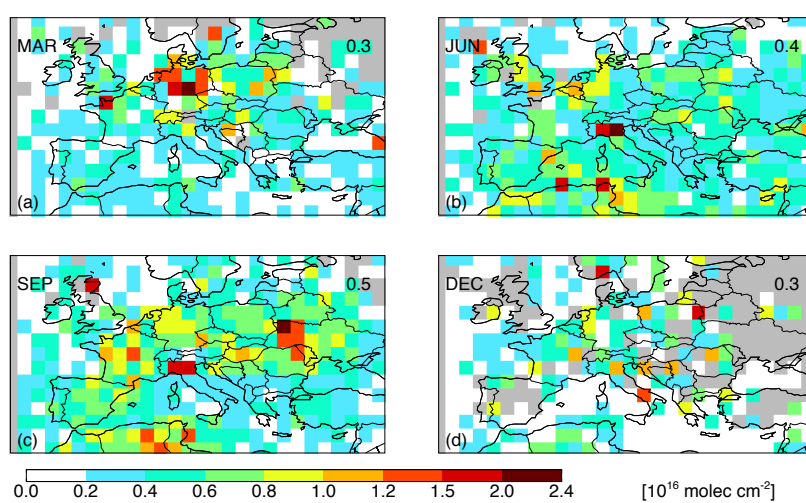

Figure S3: Monthly mean IASI  $\text{NH}_3$  column concentration averaged at  $2^\circ \times 2^\circ$  during March (a), June (b), September (c) and December (d) in 2016. Grids with valid pixels less than 10 were set to NaN value (in gray color). Domain average was shown on the top-right of each sub-figure.
